# Supplementary material for: Riukojietna, a small low-altitude ice cap that may have persisted through the Holocene: Evidence from combining cosmogenic multi-nuclide dating and lacustrine sediment records
Source: Copernicus journal article supplement (doi:10.5194/egusphere-2026-447), 2026-02-20
Supplement: Supplementary file 1 [file Riuko_Supplement_Tables_260126.xlsx]

## Sheet: Table S1
Table S1 - In situ 10Be and 26Al sample measurement details
SAMPLE	PLID - Be1	PLID - Al	Mass Quartz (g)	Be carrier (mg)	Al carrier2 (mg)	Total Al (mg)	10Be/9Be (10-13)	10Be3 (106 at)	[10Be] (105 at g-1)	Simple Age4 (ka)	26Al/Al (10-12)	26Al3 (107 at)	[26Al] (106 at g-1)	Simple Age4 (ka)	[26Al]/[10Be]
RUIKO-16-001	201800926	202001612	30.344	0.264	0.8718	1.415	3.1158 ± 0.0775	5.4942 ± 0.1370	1.8107 ± 0.0452	12.006 ± 0.300	11.6854 ± 0.5277	3.6892 ± 0.1667	1.2158 ± 0.0549	11.445 ± 0.520	6.71 ± 0.35
RUIKO-16-002	201800927	202001613	30.052	0.265	--	1.735	3.7555 ± 0.0904	6.6536 ± 0.1604	2.2140 ± 0.0534	14.706 ± 0.356	11.7205 ± 0.4176	4.5393 ± 0.1617	1.5105 ± 0.0538	14.255 ± 0.512	6.82 ± 0.29
RUIKO-16-003	201800928	202001614	16.994	0.264	1.2844	1.464	0.8519 ± 0.0423	1.4997 ± 0.0751	0.8825 ± 0.0442	6.144 ± 0.308	3.3282 ± 0.1444	1.0860 ± 0.0473	0.6391 ± 0.0278	6.306 ± 0.275	7.24 ± 0.48
RUIKO-16-004	201800929	202001615	14.991	0.264	1.2961	1.421	0.7901 ± 0.0500	1.3868 ± 0.0885	0.9251 ± 0.0590	6.406 ± 0.409	3.2357 ± 0.2036	1.0245 ± 0.0647	0.6834 ± 0.0431	6.709 ± 0.425	7.39 ± 0.66
RUIKO-16-005	201800930	202001616	18	0.269	1.2836	1.557	0.9963 ± 0.0530	1.7852 ± 0.0956	0.9918 ± 0.0531	7.927 ± 0.425	3.7198 ± 0.1489	1.2906 ± 0.0518	0.7170 ± 0.0288	8.113 ± 0.327	7.23 ± 0.48
Intercomparison
COQTZP2-AK5	202001610	202001617	5.194	0.222	1.2623	1.341	8.8055 ± 0.1339	12.7466 ± 0.2981	24.5410 ± 0.5740		28.1463 ± 0.9694	8.4255 ± 0.2903	16.2215 ± 0.5588		6.61 ± 0.28
Procedural blank								(104 at)				(104 at)
Cblk-4723	202001611	202001618	--	0.265	1.7006	1.701	0.2911 ± 0.4195	1.9454 ± 2.8033			0.6883 ± 0.9919	1.5364 ± 2.2143
NOTES
1 Prime Lab ID
2 Al carrier added if native Al (measured by inductively-coupled plasma optical emission spectroscopy (ICP-OES) at PRIME Lab) < 1.5 mg. Total Al = Native Al + Al Carrier
3 Corrected for corresponding atoms from procedural blank Cblk-4723
4 From University of Washington v3 online calculator (UWv3; Balco et al., 2008) using LSDn scaling and CRONUS-Earth global production rates (Borchers et al., 2016)
5 CoQtz-N intercomparison. Binnie et al. (2019) give preliminary nominal values of 2.53 ± 0.09 × 106 at g-1 and 15.6 ± 1.6 × 106 at g-1 for 10Be and 26Al, respectively
					-		-
References
Balco, G., Stone, J.O., Lifton, N.A., Dunai, T.J., 2008. A complete and easily accessible means of calculating surface exposure ages or erosion rates from 10Be and 26Al measurements. Quaternary Geochronology 3, 174–195. https://doi.org/10.1016/j.quageo.2007.12.001
Binnie, S.A., Dewald, A., Heinze, S., Voronina, E., Hein, A., Wittmann, H., von Blanckenburg, F., Hetzel, R., Christl, M., Schaller, M., Léanni, L., ASTER Team, Hippe, K., Vockenhuber, C., Ivy-Ochs, S., Maden, C., Fülöp, R.H., Fink, D., Wilcken, K.M., Fujioka, T., Fabel, D., Freeman, S.P.H.T., Xu, S., Fifield, L.K., Akçar, N., Spiegel, C., Dunai, T.J., 2019. Preliminary results of CoQtz-N: A quar…
Borchers, B., Marrero, S., Balco, G., Caffee, M., Goehring, B., Lifton, N., Nishiizumi, K., Phillips, F., Schaefer, J., Stone, J., 2016. Geological calibration of spallation production rates in the CRONUS-Earth project. Quaternary Geochronology 31, 188–198. https://doi.org/10.1016/j.quageo.2015.01.009
Koester, A.J., Lifton, N.A., 2023. Technical note: A software framework for calculating compositionally dependent in situ 14C production rates. Geochronology 5, 21–33. https://doi.org/10.5194/gchron-5-21-2023
Koester, A.J., Lifton, N.A., 2024. Corrigendum to “Technical note: A software framework for calculating compositionally dependent in situ 14C production rates” published in Geochronology, 5, 21–33, 2023. Geochronology. https://doi.org/10.5194/gchron-5-21-2023-corrigendum

## Sheet: Table S2
Table S2 - In situ 14C sample measurement details
SAMPLE	PCEGS1 #	PLID2	Mass Quartz (g)	C yield (mg)	Diluted mass C (mg)	AMS Split Mass C3 (mg)	𝛿13C (‰ VPDB)	14C/13C (10-12)	14C/Ctotal4 (10-14)	14C5 (106 at)	[14C] (105 at g-1)	Simple Age6 (ka)
RUIKO-16-001	PCEGS-62	201800926	5.0838	19.2 ± 0.4	304.9 ± 3.7	295.9 ± 3.6	-43.0 ± 0.2	7.1910 ± 0.1296	7.4133 ± 0.1368	0.9782 ± 0.0417	1.9242 ± 0.0820	4.881 ± 0.283
RUIKO-16-002	PCEGS-63	201800927	5.0259	14.4 ± 0.4	305.9 ± 3.7	296.9 ± 3.6	-43.5 ± 0.2	7.5577 ± 0.1423	7.7960 ± 0.1501	1.0406 ± 0.0430	2.0705 ± 0.0856	5.411 ± 0.316
RUIKO-16-003	PCEGS-64	201800928	4.67971	4.9 ± 0.4	305.7 ± 3.7	296.7 ± 3.6	-44.2 ± 0.2	5.3491 ± 0.0961	5.4634 ± 0.1014	0.6823 ± 0.0382	1.4580 ± 0.0815	3.549 ± 0.248
RUIKO-16-004	PCEGS-65	201800929	4.82716	4.9 ± 0.4	304.1 ± 3.7	295.2 ± 3.6	-44.2 ± 0.2	5.1368 ± 0.1053	5.2392 ± 0.1110	0.6437 ± 0.0386	1.3336 ± 0.0800	3.151 ± 0.230
RUIKO-16-005	PCEGS-66	201800930	5.03662	6.7 ± 0.4	308.3 ± 3.7	299.3 ± 3.6	-44.4 ± 0.2	8.1368 ± 0.1216	8.3989 ± 0.1282	1.1432 ± 0.0418	2.2698 ± 0.0830	8.160 ± 0.509
Procedural Blanks										(105 at)
PB1-03232021	PCEGS-51	202101468	--	4.1 ± 0.4	315.8 ± 3.8	306.5 ± 3.7	-43.8 ± 0.2	1.2488 ± 0.0737	1.1455 ± 0.0779	1.8138 ± 0.1252
PB1-03252021	PCEGS-52	202101469	--	4.0 ± 0.4	307.8 ± 3.7	298.8 ± 3.6	-44.6 ± 0.2	1.2531 ± 0.0644	1.1479 ± 0.0680	1.7716 ± 0.1071
PB1-04062021	PCEGS-57	202101474	--	3.5 ± 0.4	304.2 ± 3.7	295.3 ± 3.6	-43.9 ± 0.2	1.1538 ± 0.0484	1.0437 ± 0.0513	1.5920 ± 0.0806
PB1-04152021	PCEGS-61	202101478	--	2.6 ± 0.4	305.1 ± 3.7	296.2 ± 3.6	-44.4 ± 0.2	0.7731 ± 0.0535	0.6423 ± 0.0566	0.9825 ± 0.0874
PB1-04292021	PCEGS-67	202101479	--	4.2 ± 0.4	307.8 ± 3.7	298.8 ± 3.6	-44.4 ± 0.2	1.1447 ± 0.0466	1.0340 ± 0.0493	1.5958 ± 0.0785
									Mean	1.5511 ± 0.3334
NOTES
1 Purdue Carbon Extraction and Graphitization System
2 Prime Lab ID
3 Mass graphitized for AMS analysis after small aliquot (ca. 9 mg C) taken for stable C isotopic analysis offline
4 Corrected for mass-dependent graphitzation blank and stable C composition
5 Value corrected for mean procedural blank
6 From University of Washington v3 online calculator (UWv3; Balco et al., 2008) using LSDn scaling and CRONUS-Earth global production rates (Borchers et al., 2016; Koester and Lifton, 2023, 2024)

## Sheet: Table S3
Table S3: Input for University of Washington online calculator, v.3
Sample ID	Latitude (°N)	Longitude (°W)	Altitude (m)	Pressure	Sample thickness (cm)	Density (g cm-3)	Shielding factor	erosion rate (cm y-1)	date of sample collection
16-001	68.08	18.0734	1291	std	1.5	2.65	0.999492	0	2016;
16-002	68.0801	18.0731	1288	std	1.2	2.65	0.999492	0	2016;
16-003	68.0875	18.0647	1238	std	1.5	2.65	0.99718	0	2016;
16-004	68.0875	18.0641	1242	std	1.3	2.65	0.99718	0	2016;
16-005	68.0855	18.0938	1064	std	1.4	2.65	1	0	2016;
16-001	Al-26	quartz	1.21578e+06	54924.1	KNSTD;
16-002	Al-26	quartz	1.51049e+06	53820.4	KNSTD;
16-003	Al-26	quartz	639046	27816.7	KNSTD;
16-004	Al-26	quartz	683377	43129.3	KNSTD;
16-005	Al-26	quartz	716987	28785.5	KNSTD;
16-001	C-14	quartz	192417	8200	;
16-002	C-14	quartz	207051	8560	;
16-003	C-14	quartz	145800	8153	;
16-004	C-14	quartz	133357	8003	;
16-005	C-14	quartz	226977	8299	;
16-001	Be-10	quartz	181065	4515.97	07KNSTD;
16-002	Be-10	quartz	221402	5337.65	07KNSTD;
16-003	Be-10	quartz	88248.7	4417.9	07KNSTD;
16-004	Be-10	quartz	92506	5900.64	07KNSTD;
16-005	Be-10	quartz	99176.5	5312.19	07KNSTD;

## Sheet: Table S4
Table S4: Reconstructed ice thicknesses above the 2016 sample sites.
	1910 surface (m)	1960 surface (m)	1978 surface (m)	2015 surface (m)
Riuko 16-001/2	35	25	19	0
Riuko 16-003/4	33	32	30	0
